# Supplementary material
Source: publisher figshare collection journal article supplement (https://sage.figshare.com/ndownloader/files/16798661)
Supplement: Supplementary file 1 [file 16798661]

**Supplemental Table 1. Search terms and articles evaluated from PubMed, November 8, 2018**

| <b>Search terms</b>                                                                               | <b>No. of articles</b> |
|---------------------------------------------------------------------------------------------------|------------------------|
| cannabis OR marijuana OR cannabinoids AND cancer AND "systematic review"                          | 41                     |
| cannabis OR marijuana OR cannabinoids AND cancer AND "review"                                     | 561                    |
| cannabis OR marijuana OR cannabinoids AND "cancer-related fatigue"                                | 0                      |
| cannabis OR marijuana OR cannabinoids AND cancer AND fatigue                                      | 11                     |
| cannabis OR marijuana OR cannabinoids AND cancer AND "cognitive impairment"                       | 13                     |
| cannabis OR marijuana OR cannabinoids AND cancer AND neurotoxicity                                | 7                      |
| cannabis OR marijuana OR cannabinoids AND cancer AND "chemotherapy-induced peripheral neuropathy" | 6                      |
| cannabis OR marijuana OR cannabinoids AND cancer AND "cardiovascular toxicity"                    | 0                      |
| cannabis OR marijuana OR cannabinoids AND cancer AND cardiotoxicity                               | 3                      |
| cannabis OR marijuana OR cannabinoids AND "cancer pain"                                           | 110                    |
| cannabis OR marijuana OR cannabinoids AND cancer AND sleep                                        | 43                     |
| cannabis OR marijuana OR cannabinoids AND cancer AND "bone health"                                | 0                      |
| cannabis OR marijuana OR cannabinoids AND cancer AND "bone loss"                                  | 5                      |
| cannabis OR marijuana OR cannabinoids AND cancer AND "metabolic toxicity"                         | 0                      |
| cannabis OR marijuana OR cannabinoids AND cancer AND "metabolic syndrome"                         | 10                     |
| cannabis OR marijuana OR cannabinoids AND cancer AND cachexia                                     | 65                     |
| cannabis OR marijuana OR cannabinoids AND cancer AND anorexia                                     | 81                     |
| cannabis OR marijuana OR cannabinoids AND cancer AND "appetite loss"                              | 4                      |
| cannabis OR marijuana OR cannabinoids AND cancer AND "psychological distress"                     | 8                      |
| cannabis OR marijuana OR cannabinoids AND cancer AND anxiety                                      | 89                     |
| cannabis OR marijuana OR cannabinoids AND cancer AND depression                                   | 66                     |
| cannabis OR marijuana OR cannabinoids AND cancer AND "chemotherapy-induced nausea and vomiting"   | 92                     |
| cannabis OR marijuana OR cannabinoids AND cancer AND "gastrointestinal distress"                  | 0                      |
| cannabis OR marijuana OR cannabinoids AND fatigue                                                 | 123                    |
| cannabis OR marijuana OR cannabinoids AND "cognitive impairment"                                  | 202                    |
| cannabis OR marijuana OR cannabinoids AND neurotoxicity                                           | 216                    |
| cannabis OR marijuana OR cannabinoids AND cardiotoxicity                                          | 24                     |
| cannabis OR marijuana OR cannabinoids AND sleep                                                   | 721                    |
| cannabis OR marijuana OR cannabinoids AND "bone health"                                           | 5                      |
| cannabis OR marijuana OR cannabinoids AND "metabolic syndrome"                                    | 85                     |
| cannabis OR marijuana OR cannabinoids AND anorexia                                                | 215                    |
| cannabis OR marijuana OR cannabinoids AND anxiety                                                 | 1876                   |
| cannabis OR marijuana OR cannabinoids AND depression                                              | 2429                   |
| cannabis OR marijuana OR cannabinoids AND nausea                                                  | 778                    |
| cannabis OR marijuana OR cannabinoids AND "gastrointestinal distress"                             | 0                      |
